# Supplementary material for: Effect of β-Lactamase inhibitors on in vitro activity of β-Lactam antibiotics against Burkholderia cepacia complex species
Source: PubMed Central journal article supplement (PMC5111247; doi:10.1186/s13756-016-0142-3), 2016-11-16
Supplement: 13756_2016_142_MOESM1_ESM.pdf [file 13756_2016_142_MOESM1_ESM.pdf]

Table S1. Biological and geographic origin of all *Burkholderia cepacia* complex strains used in this study.[1, 2]

| Species                 | Strain                 | Biological origin              | Geographic origin |
|-------------------------|------------------------|--------------------------------|-------------------|
| <i>B. cepacia</i>       | LMG 1222 <sup>T</sup>  | Allium cepa                    | USA               |
|                         | LMG 18821              | CF patient                     | Australia         |
| <i>B. multivorans</i>   | LMG 18822              | CF patient                     | Canada            |
|                         | LMG 18825              | CF patient                     | UK                |
|                         | LMG 13010 <sup>T</sup> | CF patient                     | Belgium           |
|                         | LMG 17588              | Soil                           | Berkeley, USA     |
| <i>B. cenocepacia</i>   | LMG 16656 <sup>T</sup> | CF patient                     | Edinburgh, UK     |
|                         | LMG 18828              | CF patient                     | Canada            |
|                         | LMG 18829              | CF patient                     | USA               |
|                         | LMG 18830              | CF patient                     | Australia         |
| <i>B. vietnamiensis</i> | LMG 10929 <sup>T</sup> | Oryza sativa, rhizosphere soil | Vietnam           |
|                         | LMG 18835              | CF patient                     | USA               |
| <i>B. ambifaria</i>     | LMG 19182 <sup>T</sup> | Pea rhizosphere                | Wisconsin, USA    |
|                         | LMG 19467              | CF patient                     | Australia         |
| <i>B. lata</i>          | LMG 6992               | Soil                           | Trinidad & Tobago |
|                         | R-9940                 | CF patient                     | Canada            |
| <i>B. stabilis</i>      | LMG 14294 <sup>T</sup> | CF patient                     | Belgium           |
|                         | LMG 14086              | Respirator                     | UK                |
| <i>B. dolosa</i>        | LMG 18943 <sup>T</sup> | CF patient                     | USA               |
|                         | LMG 18941              | CF patient                     | USA               |
| <i>B. anthina</i>       | LMG 20980 <sup>T</sup> | Soil rhizosphere               | Nashville, USA    |
|                         | LMG 20983              | CF patient, sputum             | Blackpool, UK     |
| <i>B. pyrrocinia</i>    | LMG 21824              | CF patient                     | USA               |
| <i>B. ubonensis</i>     | LMG 20358 <sup>T</sup> | Surface soil                   | Thailand          |
|                         | LMG 24263              | Nosocomial infection           | Thailand          |
| <i>B. latens</i>        | LMG 24064 <sup>T</sup> | CF patient                     | Italy             |
| <i>B. arboris</i>       | LMG 24066              | Soil                           | USA               |
|                         | R-132                  | CF patient                     | USA               |
| <i>B. seminalis</i>     | LMG 24067 <sup>T</sup> | CF patient                     | USA               |
|                         | LMG 24272              | Nosocomial infection           | Thailand          |
| <i>B. metallica</i>     | LMG 24068 <sup>T</sup> | CF patient                     | USA               |
|                         | R-2712                 | CF patient                     | Canada            |
| <i>B. contaminans</i>   | LMG 16227              | CF patient, respiratory tract  | Sweden            |
|                         | R-12710                | Sheep with mastitis, milk      | Spain             |

<sup>T</sup> = Type strain

1. BCCM/LMG Bacteria Catalogue [<http://bccm.belspo.be/catalogues/lmg-catalogue-search>]
2. Mahenthiralingam E, Coenye T, Chung JW, Speert DP, Govan JR, Taylor P, Vandamme P: **Diagnostically and experimentally useful panel of strains from the Burkholderia cepacia complex.** *J Clin Microbiol* 2000, **38**:910-913.
