# Supplementary material for: Effect of β-Lactamase inhibitors on in vitro activity of β-Lactam antibiotics against Burkholderia cepacia complex species
Source: PubMed Central journal article supplement (PMC5111247; doi:10.1186/s13756-016-0142-3), 2016-11-16
Supplement: 13756_2016_142_MOESM2_ESM.pdf [file 13756_2016_142_MOESM2_ESM.pdf]

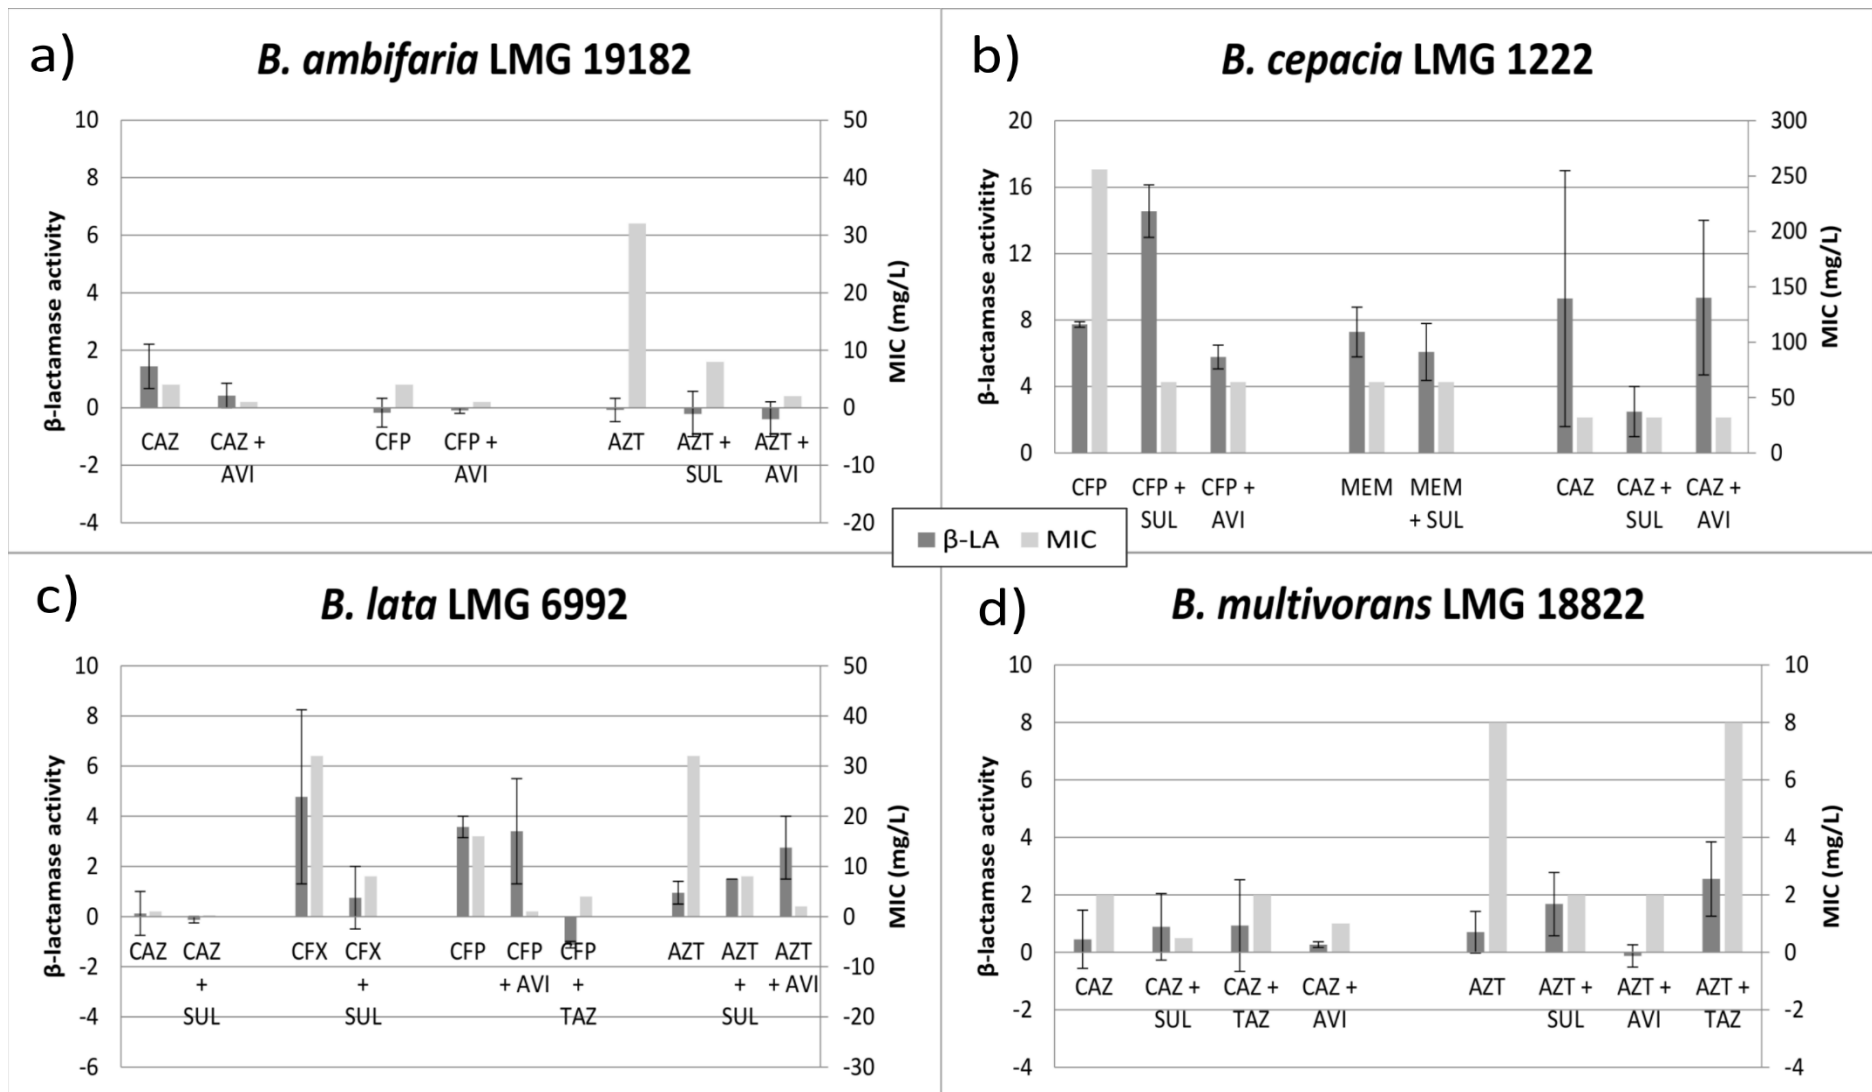

1

2 Figure S1.  $\beta$ -lactamase activity (dark grey bars, relative to untreated controls) and corresponding MIC values (light grey bars, mg/L) for a) *B. ambifaria* LMG 19182, b) *B. cepacia* LMG 1222, c) *B.*

3 *lata* LMG 6992 and d) *B. multivorans* LMG 18822. Error bars represent min-max (n=2).

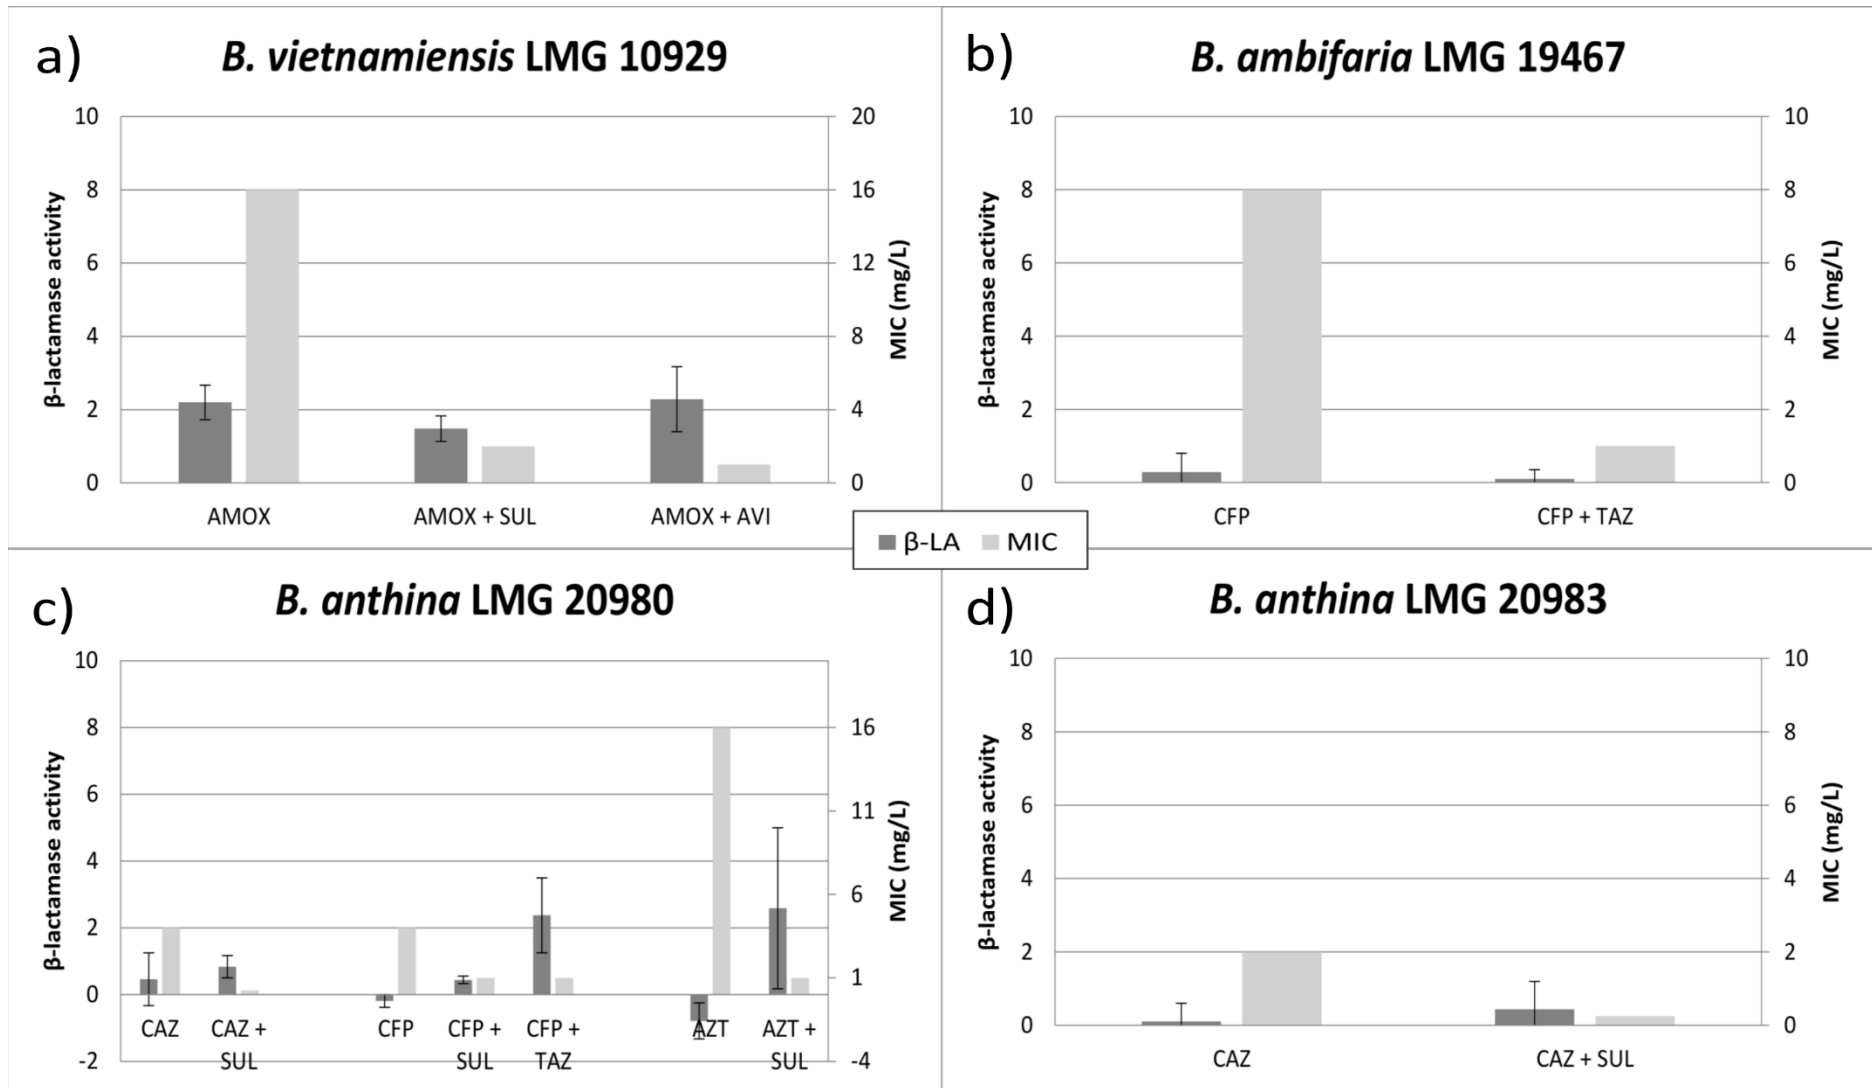

4

5 Figure S2.  $\beta$ -lactamase activity (dark grey bars, relative to untreated controls) and corresponding MIC values (light grey bars, mg/L) for a) *B. vietnamiensis* LMG 10929, b) *B. ambifaria* LMG

6 19467, c) *B. anthina* LMG 20980 and d) *B. anthina* LMG 20983. Error bars represent min-max (n=2).

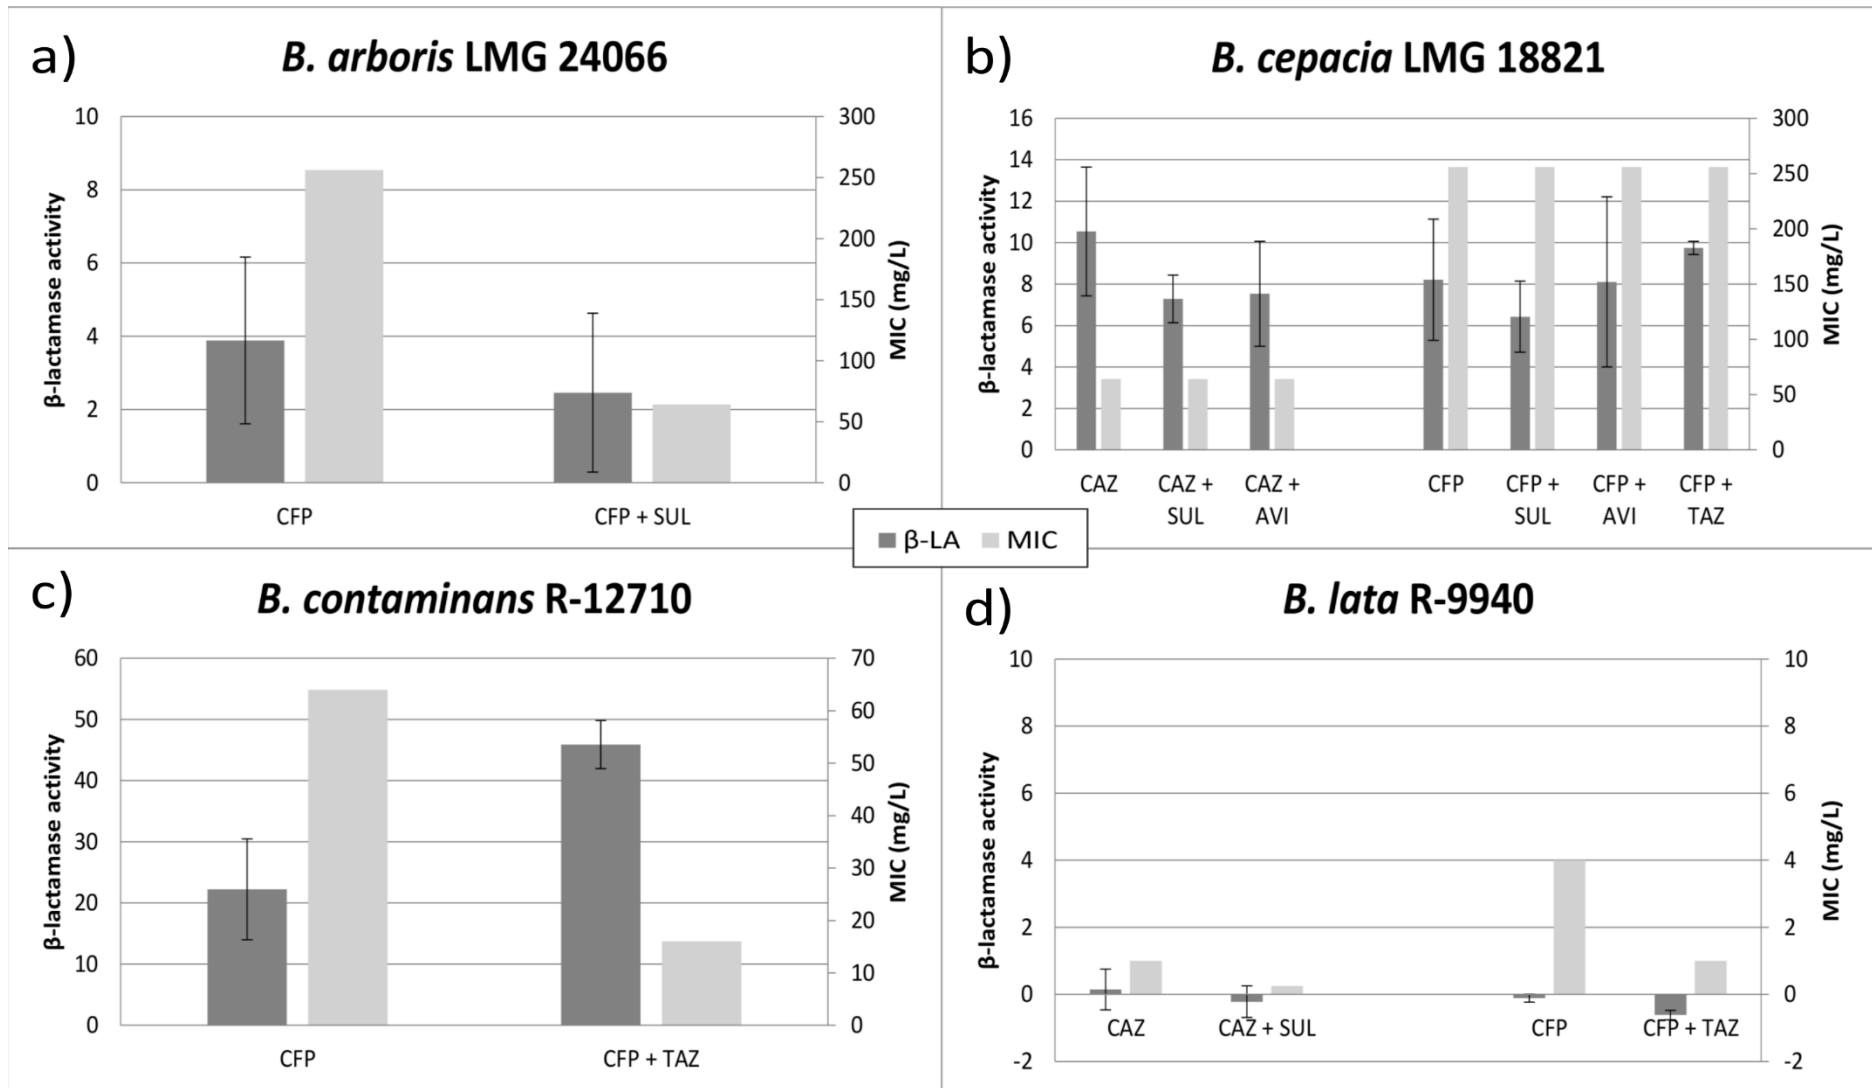

7

8 Figure S3.  $\beta$ -lactamase activity (dark grey bars, relative to untreated controls) and corresponding MIC values (light grey bars, mg/L) for a) *B. arboris* LMG 24066, b) *B. cepacia* LMG 18821, c) *B.*

9 *contaminans* R-12710 and d) *B. lata* R-9940. Error bars represent min-max (n=2).

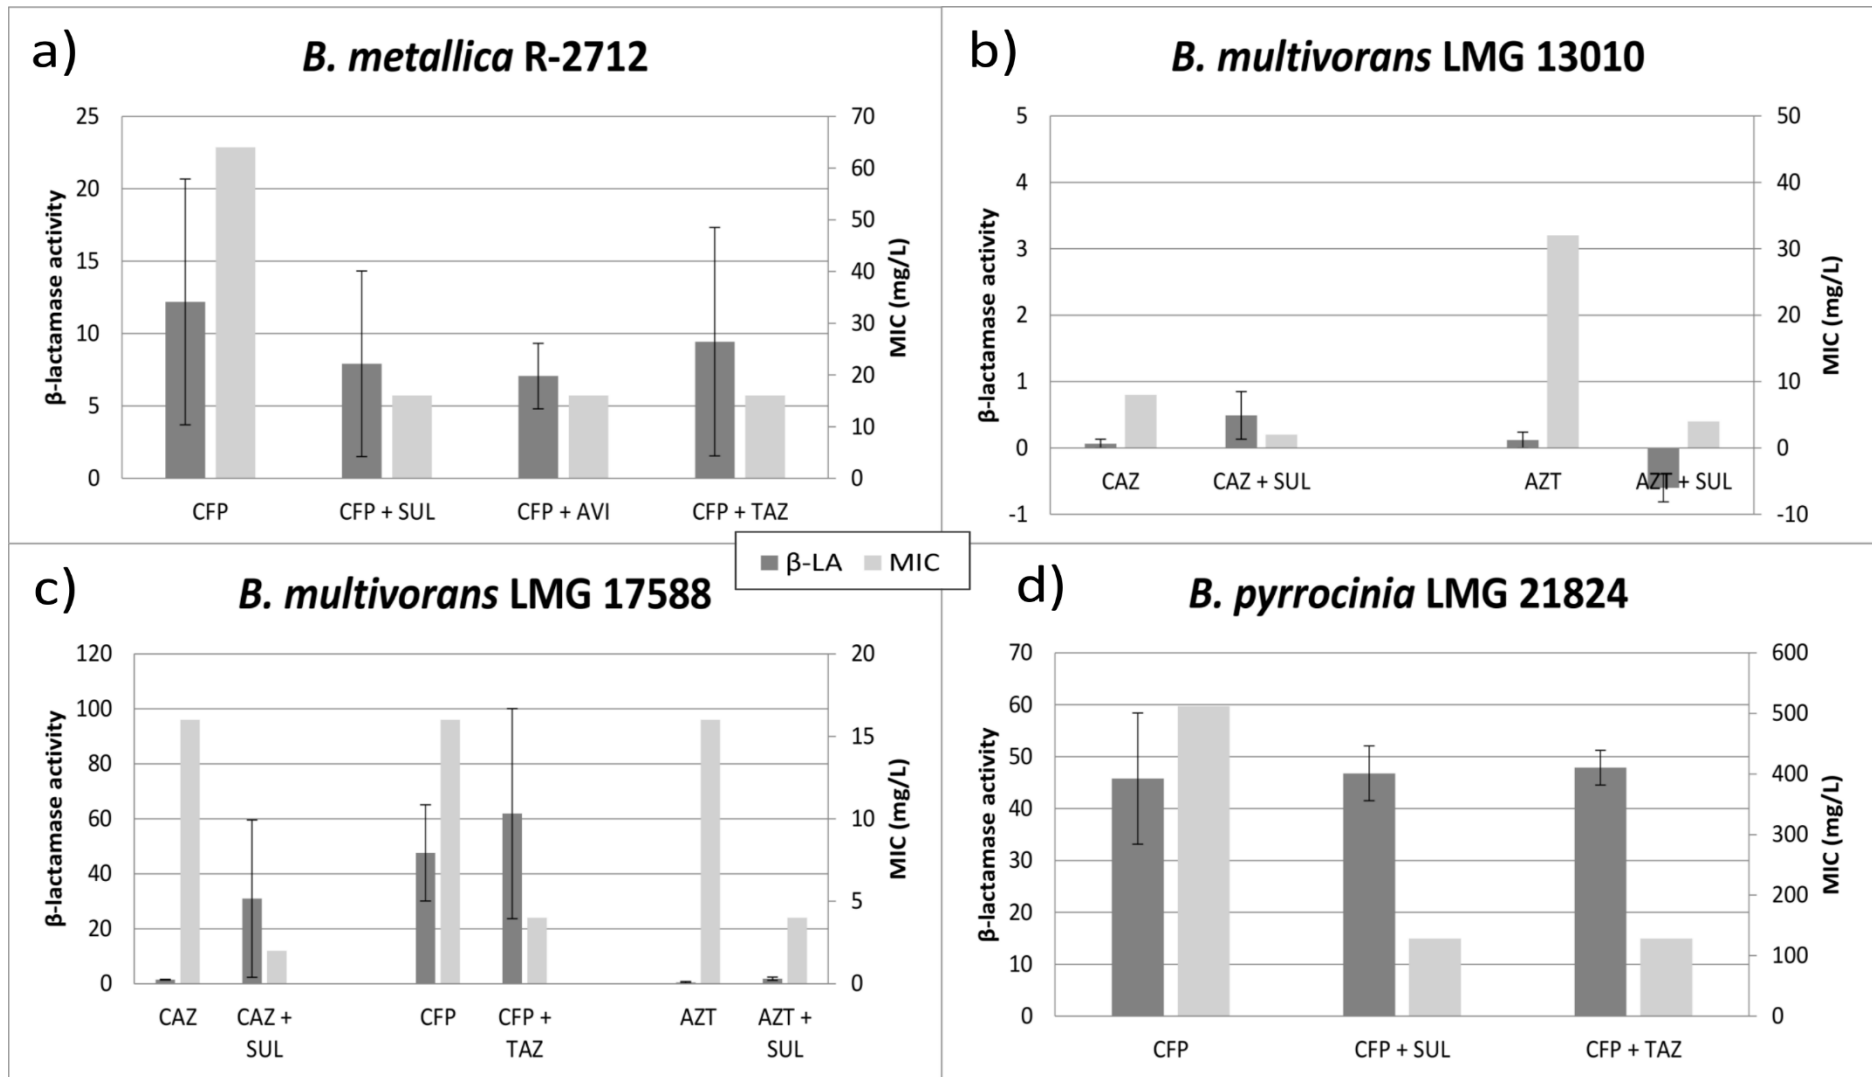

10

11

12

Figure S4.  $\beta$ -lactamase activity (dark grey bars, relative to untreated controls) and corresponding MIC values (light grey bars, mg/L) for a) *B. metallica* R-2712, b) *B. multivorans* LMG 13010, c) *B. multivorans* LMG 17588 and d) *B. pyrrocinia* LMG 21824. Error bars represent min-max (n=2).

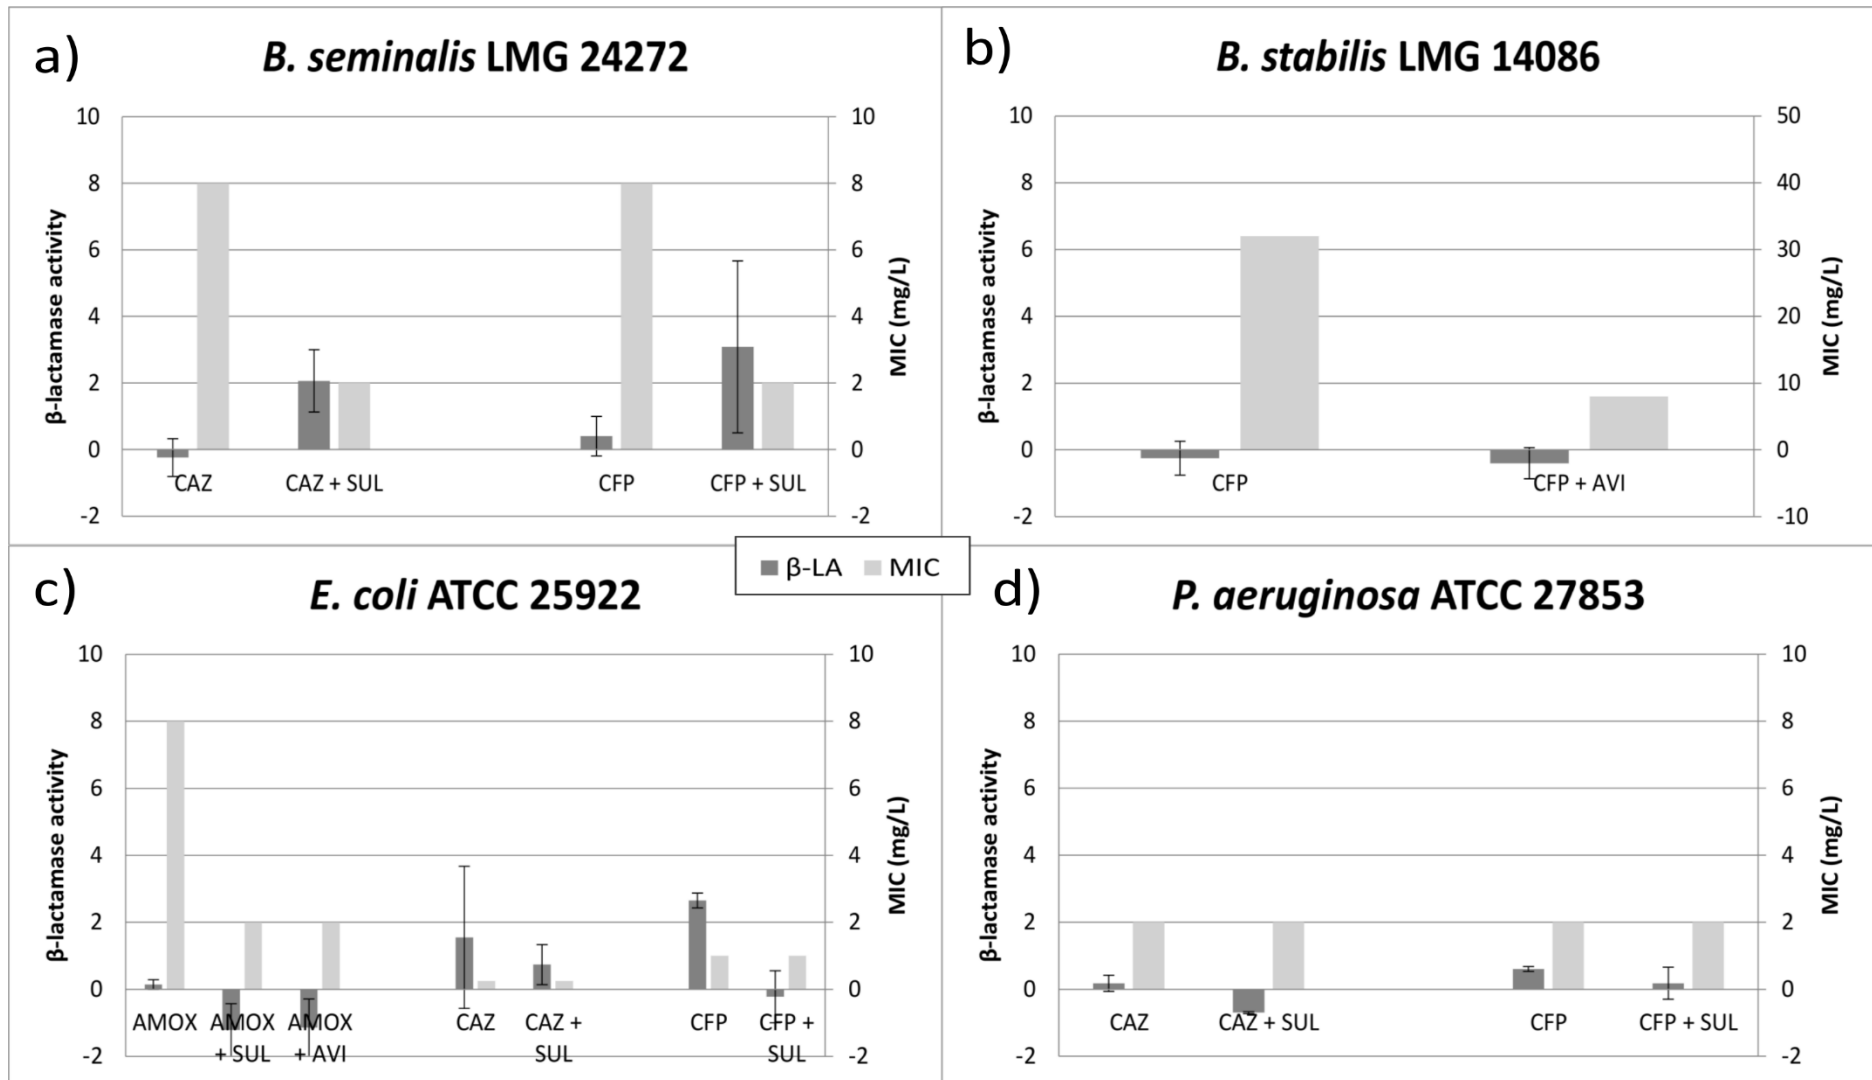

13

14 Figure S5.  $\beta$ -lactamase activity (dark grey bars, relative to untreated controls) and corresponding MIC values (light grey bars, mg/L) for a) *B. seminalis* LMG 24272, b) *B. stabilis* LMG 14086 and

15 two control strains: c) *E. coli* ATCC 25922 and d) *P. aeruginosa* ATCC 27853. Error bars represent min-max (n=2).
